# Supplementary material for: What about Current Diversity of Mycolactone-Producing Mycobacteria? Implication for the Diagnosis and Treatment of Buruli Ulcer
Source: Int J Mol Sci. 2023 Sep 6;24(18):13727. doi: 10.3390/ijms241813727 (PMC10531242; doi:10.3390/ijms241813727)
Supplement: Supplementary file 1 [file ijms-24-13727-s001.zip › Supplementary.xlsx]

## Sheet: Studies
Author	Year	Information	Journal	Location	Target species	Sample type	PCR 16S rRNA	PCR IS2404	PCR IS2606	PCR 2426	PCR KR	qPCR IS2404	qPCR IS2606	qPCR KR	MIRU-VNTR	DOI	Rq
Hayman et al.	1991	Not relevant	International Journal of Epidemiology	Victoria, Australia	M. ulcerans	NA	NA	NA	NA	NA	NA	NA	NA	NA	NA	10.1093/ije/20.4.1093
Falkinham	1996	Not relevant	Clinical Microbiology Reviews	NA	Mycobacteries	NA	NA	NA	NA	NA	NA	NA	NA	NA	NA	NA
Portaels et al.	1996	Relevant	Journal of Clinical Microbiology	Africa, America, Australia	M. ulcerans	Biopsy	16S rRNA	NA	NA	NA	NA	NA	NA	NA	NA	10.1128/jcm.34.4.962-965.1996
Meyers	1996	Relevant	British Journal of Dermatology	Togo, Africa	M. ulcerans	Biopsy	16S rRNA	NA	NA	NA	NA	NA	NA	NA	NA	10.1046/j.1365-2133.1996.d01-914.x
Portaels et al.	1997	Relevant	Journal of Clinical Microbiology	Benin, Africa	M. ulcerans	Biopsy	16S rRNA	NA	NA	NA	NA	NA	NA	NA	NA	10.1128/jcm.35.5.1097-1100.1997
Ross et al.	1997	Relevant	Journal of Clinical Microbiology	Multiple	M. ulcerans	Biopsy	NA	MU1/MU2	NA	NA	NA	NA	NA	NA	NA	10.1128/jcm.35.7.1696-1700.1997
Ross et al.	1997	Relevant	Applied and Environmental Microbiology	Australia	M. ulcerans	Water	NA	MU1/MU2	NA	NA	NA	NA	NA	NA	NA	10.1128/aem.63.10.4135-4138.1997
Stinear et al.	1999	Relevant	Journal of Clinical Microbiology	Multiple	M. ulcerans	Isolates	NA	MU3/MU4	NA	NA	NA	NA	NA	NA	NA	10.1128/JCM.37.4.1018-1023.1999	This PCR primer pairs amplify between tandem copies of IS2404
Stinear et al.	1999	Relevant	Journal of Clinical Microbiology	Multiple	M. ulcerans	Isolates	NA	MU5/MU6	NA	NA	NA	NA	NA	NA	NA	10.1128/JCM.37.4.1018-1023.1999
Stinear et al.	1999	Relevant	Journal of Clinical Microbiology	Multiple	M. ulcerans	Isolates	NA	NA	MU7/MU8	NA	NA	NA	NA	NA	NA	10.1128/JCM.37.4.1018-1023.1999
Guimaraes-Peres et al.	1999	Not relevant	Journal of Clinical Microbiology	Multiple	M. ulcerns	Isolates	NA	MU1/MU2; PGP3/PGP4	NA	NA	NA	NA	NA	NA	NA	10.1128/JCM.37.1.206-208.1999	Nested-PCR
Stinear et al.	2000	Relevant	Applied and Environmental Microbiology	Australia	M. ulcerans	Water, Plant	NA	MU5/MU6	NA	NA	NA	NA	NA	NA	NA	10.1128/AEM.66.8.3206-3213.2000
Stinear et al.	2000	Relevant	Applied and Environmental Microbiology	Australia	M. ulcerans	Water, Plant	NA	NA	MU7/MU8	NA	NA	NA	NA	NA	NA	10.1128/AEM.66.8.3206-3213.2000
Stinear et al.	2000	Relevant	Journal of Clinical Microbiology	Multiple	M. ulcerans	Isolates	NA	NA	NA	MU4/MU9	NA	NA	NA	NA	NA	10.1128/JCM.38.4.1482-1487.2000	This PCR primer pairs amplify between adjacent copies of IS2404 & IS2606
Marsollier et al.	2002	Not relevant	Applied and Environmental Microbiology	Côte d'Ivoire, Africa	M. ulcerans	Aquatic insects	NA	MU1/MU2; PGP3/PGP4	NA	NA	NA	NA	NA	NA	NA	10.1128/AEM.68.9.4623-4628.2002	Nested-PCR
Marsollier et al.	2003	Not relevant	Antimicrobial Agents and Chemotherapy	French Guiana	M. ulcerans	Isolates	NA	NA	NA	NA	NA	NA	NA	NA	NA	10.1128/AAC.47.4.1228-1232.2003
Marsollier et al.	2003	Relevant	Pathologie Biologie	Côte d'Ivoire, Africa	M. ulcerans	Aquatic invertebrates	NA	MU1/MU2	NA	NA	NA	NA	NA	NA	NA	10.1016/S0369-8114(03)00151-2
Pszolla et al.	2003	Not relevant	Clinical Infectious Diseases	NA	M. ulcerans	Biopsy	NA	NA	NA	NA	NA	NA	NA	NA	NA	10.1086/377170
Rondini et al.	2003	Relevant	Journal of Clinical Microbiology	Multiple	M. ulcerans	Isolates	NA	MU1/MU2	NA	NA	NA	F1/R1/P1	NA	NA	NA	10.1128/JCM.41.9.4231–4237.2003
Stienstra et al.	2003	Relevant	Journal of Clinical Microbiology	Ghana, Africa	M. ulcerans	Tissues	NA	MU1/MU2; PGP3/PGP4	NA	NA	NA	NA	NA	NA	NA	10.1128/JCM.41.2.794-797.2003	Nested-PCR
Eddyani et al.	2004	Relevant	Applied and Environmental Microbiology	Benin & Ghana, Africa	M. ulcerans	Fish	NA	MU1/MU2	NA	NA	NA	NA	NA	NA	NA	10.1128/AEM.70.9.5679–5681.2004
Kotlowski et al.	2004	Not relevant	Journal of Medical Microbiology	Benin, Africa	M. ulcerans	Aquatic invertebrates, fish, molluscs, Human tissues	NA	PGP1/PGP2; PGP3/PGP4	NA	NA	NA	NA	NA	NA	NA	10.1099/jmm.0.45593-0	Nested-PCR
Marsollier et al.	2004	Not relevant	Applied and Environmental Microbiology	French Guiana	M. ulcerans	Aquatic invertebrates	NA	MU1/MU2; PGP3/PGP4	NA	NA	NA	NA	NA	NA	NA	10.1128/AEM.70.10.6296–6298.2004	Nested-PCR
Marsollier et al.	2004	Relevant	Applied and Environmental Microbiology	Strains from French Guiana, Ivory Coast,Ghana	M. ulcerans	MU culture	NA	MU1/MU2	NA	NA	NA	NA	NA	NA	NA	10.1128/AEM.70.10.6296–6298.2004
Kotlowski et al.	2015	Relevant	Journal of Medical Microbiology	Multiple	M. ulcerans	Aquatic invertebrates, Fish, Molluscs	NA	PGP1/PGP2; PGP3/PGP4	NA	NA	NA	NA	NA	NA	NA	10.1099/jmm.0.45593-0
Ablordey et al.	2005	Relevant	Journal of Clinical Microbiology	Multiple	M. ulcerans	Isolates	NA	NA	NA	NA	NA	NA	NA	NA	Locus1	10.1128/JCM.43.4.1546–1551.2005
Ablordey et al.	2005	Relevant	Journal of Clinical Microbiology	Multiple	M. ulcerans	Isolates	NA	NA	NA	NA	NA	NA	NA	NA	Locus4	10.1128/JCM.43.4.1546–1551.2005
Ablordey et al.	2005	Relevant	Journal of Clinical Microbiology	Multiple	M. ulcerans	Isolates	NA	NA	NA	NA	NA	NA	NA	NA	Locus6	10.1128/JCM.43.4.1546–1551.2005
Ablordey et al.	2005	Relevant	Journal of Clinical Microbiology	Multiple	M. ulcerans	Isolates	NA	NA	NA	NA	NA	NA	NA	NA	Locus8	10.1128/JCM.43.4.1546–1551.2005
Ablordey et al.	2005	Relevant	Journal of Clinical Microbiology	Multiple	M. ulcerans	Isolates	NA	NA	NA	NA	NA	NA	NA	NA	Locus9	10.1128/JCM.43.4.1546–1551.2005
Ablordey et al.	2005	Relevant	Journal of Clinical Microbiology	Multiple	M. ulcerans	Isolates	NA	NA	NA	NA	NA	NA	NA	NA	Locus10	10.1128/JCM.43.4.1546–1551.2005
Ablordey et al.	2005	Relevant	Journal of Clinical Microbiology	Multiple	M. ulcerans	Isolates	NA	NA	NA	NA	NA	NA	NA	NA	Locus13	10.1128/JCM.43.4.1546–1551.2005
Ablordey et al.	2005	Relevant	Journal of Clinical Microbiology	Multiple	M. ulcerans	Isolates	NA	NA	NA	NA	NA	NA	NA	NA	Locus14	10.1128/JCM.43.4.1546–1551.2005
Ablordey et al.	2005	Relevant	Journal of Clinical Microbiology	Multiple	M. ulcerans	Isolates	NA	NA	NA	NA	NA	NA	NA	NA	Locus15	10.1128/JCM.43.4.1546–1551.2005
Ablordey et al.	2005	Relevant	Journal of Clinical Microbiology	Multiple	M. ulcerans	Isolates	NA	NA	NA	NA	NA	NA	NA	NA	Locus16	10.1128/JCM.43.4.1546–1551.2005
Ablordey et al.	2005	Relevant	Journal of Clinical Microbiology	Multiple	M. ulcerans	Isolates	NA	NA	NA	NA	NA	NA	NA	NA	Locus18	10.1128/JCM.43.4.1546–1551.2005
Ablordey et al.	2005	Relevant	Journal of Clinical Microbiology	Multiple	M. ulcerans	Isolates	NA	NA	NA	NA	NA	NA	NA	NA	Locus19	10.1128/JCM.43.4.1546–1551.2005
Johnson et al.	2005	Not relevant	PLoS Medicine	None	M. ulcerans	NA	NA	NA	NA	NA	NA	NA	NA	NA	NA	10.1371/journal.pmed.0020108
Merritt et al.	2005	Not relevant	Frontiers in Ecology and the Environment	Multiple	M. ulcerans	NA	NA	NA	NA	NA	NA	NA	NA	NA	NA	10.1890/1540-9295(2005)003[0323:UAEDAW]2.0.CO;2
Mve-Obiang	2005	Not relevant	Infection and Immunity	Multiple locations	M. liflandii	Isolates	NA	NA	NA	NA	mlsA1; mlsB	NA	NA	NA	NA	10.1128/IAI.73.6.3307–3312.2005
Stinear	2005	Not relevant	Microbiology	None	M. ulcerans	Isolates	NA	NA	NA	NA	NA	NA	NA	NA	NA	10.1099/mic.0.27674-0
Stragier et al.	2005	Relevant	Journal of Bacteriology	Multiple	M. ulcerans	Isolates	NA	MU1/MU2	NA	NA	NA	NA	NA	NA	NA	10.1128/JB.187.5.1639–1647.2005
Stragier et al.	2005	Relevant	Journal of Bacteriology	Multiple	M. ulcerans	Isolates	NA	MU1/MU2	NA	NA	NA	NA	NA	NA	NA	10.1128/JB.187.5.1639–1647.2005
Stragier et al.	2005	Relevant	Journal of Bacteriology	Multiple	M. ulcerans	Isolates	NA	MU1/MU2	NA	NA	NA	NA	NA	NA	MIRU1	10.1128/JB.187.5.1639–1647.2005
Stragier et al.	2005	Relevant	Journal of Bacteriology	Multiple	M. ulcerans	Isolates	NA	MU1/MU2	NA	NA	NA	NA	NA	NA	MIRU2	10.1128/JB.187.5.1639–1647.2005
Stragier et al.	2005	Relevant	Journal of Bacteriology	Multiple	M. ulcerans	Isolates	NA	MU1/MU2	NA	NA	NA	NA	NA	NA	MIRU5	10.1128/JB.187.5.1639–1647.2005
Stragier et al.	2005	Relevant	Journal of Bacteriology	Multiple	M. ulcerans	Isolates	NA	MU1/MU2	NA	NA	NA	NA	NA	NA	MIRU7	10.1128/JB.187.5.1639–1647.2005
Stragier et al.	2005	Relevant	Journal of Bacteriology	Multiple	M. ulcerans	Isolates	NA	MU1/MU2	NA	NA	NA	NA	NA	NA	MIRU9	10.1128/JB.187.5.1639–1647.2005
Stragier et al.	2005	Relevant	Journal of Bacteriology	Multiple	M. ulcerans	Isolates	NA	MU1/MU2	NA	NA	NA	NA	NA	NA	MIRU20	10.1128/JB.187.5.1639–1647.2005
Stragier et al.	2005	Relevant	Journal of Bacteriology	Multiple	M. ulcerans	Isolates	NA	MU1/MU2	NA	NA	NA	NA	NA	NA	MIRU33	10.1128/JB.187.5.1639–1647.2005
Phillips et al.	2005	Relevant	Journal of Clinical Microbiology	Ghana, Africa	M. ulcerans	Biopsy	NA	PU4F/PU7Rbio	NA	NA	NA	NA	NA	NA	NA	10.1128/JCM.43.8.3650–3656.2005
Adékambi et al.	2006	Not relevant	Applied and Environmental Microbiology	Multiple	NA	NA	NA	NA	NA	NA	NA	NA	NA	NA	NA	10.1128/AEM.03075-05
Brudey et al.	2006	Not relevant	Journal of Clinical Microbiology	Guadeloupe, Martinique, French Guiana	M. tuberculosis	NA	NA	NA	NA	NA	NA	NA	NA	NA	NA	10.1128/JCM.44.1.183–191.2006
Hilty et al.	2006	Relevant	Journal of Bacteriology	Ghana, Africa	M. ulcerans	Isolates	NA	NA	NA	NA	NA	NA	NA	NA	ST1	10.1128/JB.188.4.1462–1465.2006
Hilty et al.	2006	Relevant	Journal of Bacteriology	Ghana, Africa	M. ulcerans	Isolates	NA	NA	NA	NA	NA	NA	NA	NA	MIRU1	10.1128/JB.188.4.1462–1465.2006
Ranger et al.	2006	Relevant	Infection and Immunity	Multiple	Mycobacteria	Isolates	NA	MU5/MU6	MU7/MU8	NA	mlsA1; mlsB	NA	NA	NA	NA	10.1128/IAI.00970-06
Wansbrough-Jones et al.	2006	Not relevant	Lancet	None	M. ulcerans	NA	NA	NA	NA	NA	NA	NA	NA	NA	NA	10.1016/S0140-6736(06)68807-7
Stragier et al.	2007	Relevant	Systematic and Applied Microbiology	Multiple	M. ulcerans	Isolates	NA	IS2404	IS2606	NA	NA	NA	NA	NA	MIRU1	10.1016/j.syapm.2007.06.001
Stragier et al.	2007	Relevant	Systematic and Applied Microbiology	Multiple	M. ulcerans	Isolates	NA	IS2404	IS2606	NA	NA	NA	NA	NA	VNTR2	10.1016/j.syapm.2007.06.001
Stragier et al.	2007	Relevant	Systematic and Applied Microbiology	Multiple	M. ulcerans	Isolates	NA	IS2404	IS2606	NA	NA	NA	NA	NA	VNTR5	10.1016/j.syapm.2007.06.001
Stragier et al.	2007	Relevant	Systematic and Applied Microbiology	Multiple	M. ulcerans	Isolates	NA	IS2404	IS2606	NA	NA	NA	NA	NA	VNTR6	10.1016/j.syapm.2007.06.001
Stragier et al.	2007	Relevant	Systematic and Applied Microbiology	Multiple	M. ulcerans	Isolates	NA	IS2404	IS2606	NA	NA	NA	NA	NA	VNTR9	10.1016/j.syapm.2007.06.001
Stragier et al.	2007	Relevant	Systematic and Applied Microbiology	Multiple	M. ulcerans	Isolates	NA	IS2404	IS2606	NA	NA	NA	NA	NA	MIRU33	10.1016/j.syapm.2007.06.001
Ablordey et al.	2007	Relevant	Clinical Microbiology and Infection	Africa	M. ulcerans	NA	NA	NA	NA	NA	NA	NA	NA	NA	MUL_0583	10.1111/j.1469-0691.2007.01716.x
Fyfe et al.	2007	Relevant	Applied and Environmental Microbiology	Multiple	M. ulcerans	Aquatic invertebrates, Human tissues	NA	NA	NA	NA	NA	IS2404TF/TR/TP	IS2606TF/TR/TP	KRTF/KRTR/KRTP	NA	10.1128/AEM.02971-06
Hilty et al.	2007	Relevant	Microbiology	Ghana, Africa	M. ulcerans	Isolates	NA	NA	NA	NA	NA	NA	NA	NA	Locus1	10.1099/mic.0.2006/004564-0
Hilty et al.	2007	Relevant	Microbiology	Ghana, Africa	M. ulcerans	Isolates	NA	NA	NA	NA	NA	NA	NA	NA	Locus2	10.1099/mic.0.2006/004564-0
Hilty et al.	2007	Relevant	Microbiology	Ghana, Africa	M. ulcerans	Isolates	NA	NA	NA	NA	NA	NA	NA	NA	Locus3	10.1099/mic.0.2006/004564-0
Hilty et al.	2007	Relevant	Microbiology	Ghana, Africa	M. ulcerans	Isolates	NA	NA	NA	NA	NA	NA	NA	NA	Locus4	10.1099/mic.0.2006/004564-0
Hilty et al.	2007	Relevant	Microbiology	Ghana, Africa	M. ulcerans	Isolates	NA	NA	NA	NA	NA	NA	NA	NA	Locus5	10.1099/mic.0.2006/004564-0
Hilty et al.	2007	Relevant	Microbiology	Ghana, Africa	M. ulcerans	Isolates	NA	NA	NA	NA	NA	NA	NA	NA	Locus6	10.1099/mic.0.2006/004564-0
Hilty et al.	2007	Relevant	Microbiology	Ghana, Africa	M. ulcerans	Isolates	NA	NA	NA	NA	NA	NA	NA	NA	Locus7	10.1099/mic.0.2006/004564-0
Hilty et al.	2007	Relevant	Microbiology	Ghana, Africa	M. ulcerans	Isolates	NA	NA	NA	NA	NA	NA	NA	NA	Locus8	10.1099/mic.0.2006/004564-0
Hilty et al.	2007	Relevant	Microbiology	Ghana, Africa	M. ulcerans	Isolates	NA	NA	NA	NA	NA	NA	NA	NA	Locus9	10.1099/mic.0.2006/004564-0
Hilty et al.	2007	Relevant	Microbiology	Ghana, Africa	M. ulcerans	Isolates	NA	NA	NA	NA	NA	NA	NA	NA	Locus10	10.1099/mic.0.2006/004564-0
Hilty et al.	2007	Relevant	Microbiology	Ghana, Africa	M. ulcerans	Isolates	NA	NA	NA	NA	NA	NA	NA	NA	Locus11	10.1099/mic.0.2006/004564-0
Hilty et al.	2007	Relevant	Microbiology	Ghana, Africa	M. ulcerans	Isolates	NA	NA	NA	NA	NA	NA	NA	NA	Locus12	10.1099/mic.0.2006/004564-0
Hilty et al.	2007	Relevant	Microbiology	Ghana, Africa	M. ulcerans	Isolates	NA	NA	NA	NA	NA	NA	NA	NA	Locus13	10.1099/mic.0.2006/004564-0
Hilty et al.	2007	Relevant	Microbiology	Ghana, Africa	M. ulcerans	Isolates	NA	NA	NA	NA	NA	NA	NA	NA	Locus14	10.1099/mic.0.2006/004564-0
Hilty et al.	2007	Relevant	Microbiology	Ghana, Africa	M. ulcerans	Isolates	NA	NA	NA	NA	NA	NA	NA	NA	Locus15	10.1099/mic.0.2006/004564-0
Hilty et al.	2007	Relevant	Microbiology	Ghana, Africa	M. ulcerans	Isolates	NA	NA	NA	NA	NA	NA	NA	NA	Locus16	10.1099/mic.0.2006/004564-0
Hilty et al.	2007	Relevant	Microbiology	Ghana, Africa	M. ulcerans	Isolates	NA	NA	NA	NA	NA	NA	NA	NA	Locus17	10.1099/mic.0.2006/004564-0
Hilty et al.	2007	Relevant	Microbiology	Ghana, Africa	M. ulcerans	Isolates	NA	NA	NA	NA	NA	NA	NA	NA	Locus18	10.1099/mic.0.2006/004564-0
Hilty et al.	2007	Relevant	Microbiology	Ghana, Africa	M. ulcerans	Isolates	NA	NA	NA	NA	NA	NA	NA	NA	Locus19	10.1099/mic.0.2006/004564-0
Hilty et al.	2007	Relevant	Microbiology	Ghana, Africa	M. ulcerans	Isolates	NA	NA	NA	NA	NA	NA	NA	NA	Locus20	10.1099/mic.0.2006/004564-0
Hilty et al.	2007	Relevant	Microbiology	Ghana, Africa	M. ulcerans	Isolates	NA	NA	NA	NA	NA	NA	NA	NA	Locus21	10.1099/mic.0.2006/004564-0
Hilty et al.	2007	Relevant	Microbiology	Ghana, Africa	M. ulcerans	Isolates	NA	NA	NA	NA	NA	NA	NA	NA	Locus22	10.1099/mic.0.2006/004564-0
Hilty et al.	2007	Relevant	Microbiology	Ghana, Africa	M. ulcerans	Isolates	NA	NA	NA	NA	NA	NA	NA	NA	Locus23	10.1099/mic.0.2006/004564-0
Hilty et al.	2007	Relevant	Microbiology	Ghana, Africa	M. ulcerans	Isolates	NA	NA	NA	NA	NA	NA	NA	NA	Locus24	10.1099/mic.0.2006/004564-0
Hilty et al.	2007	Relevant	Microbiology	Ghana, Africa	M. ulcerans	Isolates	NA	NA	NA	NA	NA	NA	NA	NA	Locus25	10.1099/mic.0.2006/004564-0
Hilty et al.	2007	Relevant	Microbiology	Ghana, Africa	M. ulcerans	Isolates	NA	NA	NA	NA	NA	NA	NA	NA	Locus26	10.1099/mic.0.2006/004564-0
Hilty et al.	2007	Relevant	Microbiology	Ghana, Africa	M. ulcerans	Isolates	NA	NA	NA	NA	NA	NA	NA	NA	Locus27	10.1099/mic.0.2006/004564-0
Hilty et al.	2007	Relevant	Microbiology	Ghana, Africa	M. ulcerans	Isolates	NA	NA	NA	NA	NA	NA	NA	NA	Locus28	10.1099/mic.0.2006/004564-0
Hilty et al.	2007	Relevant	Microbiology	Ghana, Africa	M. ulcerans	Isolates	NA	NA	NA	NA	NA	NA	NA	NA	Locus29	10.1099/mic.0.2006/004564-0
Hilty et al.	2007	Relevant	Microbiology	Ghana, Africa	M. ulcerans	Isolates	NA	NA	NA	NA	NA	NA	NA	NA	Locus30	10.1099/mic.0.2006/004564-0
Hilty et al.	2007	Relevant	Microbiology	Ghana, Africa	M. ulcerans	Isolates	NA	NA	NA	NA	NA	NA	NA	NA	Locus31	10.1099/mic.0.2006/004564-0
Hilty et al.	2007	Relevant	Microbiology	Ghana, Africa	M. ulcerans	Isolates	NA	NA	NA	NA	NA	NA	NA	NA	Locus32	10.1099/mic.0.2006/004564-0
Hilty et al.	2007	Relevant	Microbiology	Ghana, Africa	M. ulcerans	Isolates	NA	NA	NA	NA	NA	NA	NA	NA	Locus33	10.1099/mic.0.2006/004564-0
Hilty et al.	2007	Relevant	Microbiology	Ghana, Africa	M. ulcerans	Isolates	NA	NA	NA	NA	NA	NA	NA	NA	Locus34	10.1099/mic.0.2006/004564-0
Johnson et al.	2007	Relevant	Emerging Infectious Diseases	Victoria, Australia	M. ulcerans	Biopsy, Mosquitoes	NA	NA	NA	NA	NA	IS2404TF/TR/TP	IS2606TF/TR/TP	NA	Locus9	10.3201/eid1311.061369
Käser et al.	2007	Not relevant	BMC Evolutionary Biology	Multiple	M. ulcerans	Isolates	NA	NA	NA	NA	NA	NA	NA	NA	NA	10.1186/1471-2148-7-177
Marsollier et al.	2007	Relevant	Cellular Microbiology	Benin, Africa	M. ulcerans	Aquatic invertebrates	NA	MU1/MU2	NA	NA	NA	NA	NA	NA	NA	10.1111/j.1462-5822.2006.00790.x
Marsollier et al.	2007	Relevant	PLoS Medicine	Benin, Africa	M. ulcerans	Aquatic invertebrates	NA	MU1/MU2	NA	NA	NA	NA	NA	NA	NA	10.1371/journal.pmed.0040064
Pouillot et al.	2007	Relevant	PLoS Neglected Tropical Diseases	Cameroon, Africa	M. ulcerans	Biopsy	NA	MU3/MU4; MU6/MU6	MU7/MU8	NA	NA	NA	NA	NA	NA	10.1371/journal.pntd.0000101
Quek et al.	2007	Relevant	Emerging Infectious Diseases	Australia	M. ulcerans	Biopsy	NA	MU1/MU2	NA	NA	NA	NA	NA	NA	NA	10.3201/eid1311.061206
Stinear et al.	2007	Not relevant	Genome Research	Ghana, Africa	M. ulcerans	Isolates	NA	NA	NA	NA	NA	NA	NA	NA	NA	10.1101/gr.5942807.
Suykerbuyk et al.	2007	Not relevant	Emerging Infectious Diseases	None	M. liflandii	Isolates	NA	NA	NA	NA	NA	NA	NA	NA	NA	10.3201/eid1305.060625.
Benbow et al.	2008	Relevant	Emerging Infectious Diseases	Ghana, Africa	M. ulcerans	Aquatic invertebrates	NA	NA	NA	NA	KR (mlsA)	NA	NA	NA	NA	10.3201/eid1408.071503
Brou et al.	2008	Not relevant	PLoS Neglected Tropical Diseases	Côte d'Ivoire, Africa	M. ulcerans	NA	NA	NA	NA	NA	NA	NA	NA	NA	NA	10.1371/journal.pntd.0000271
Guerra et al.	2008	Relevant	Emerging Infectious Diseases	Peru, South America	M. ulcerans	Biopsy	NA	MU1/MU2	NA	NA	NA	NA	NA	NA	NA	10.3201/eid1403.070904
Lavender et al.	2008	Relevant	Federation of European Microbiological Societies	Victoria, Australia	M. ulcerans	Aquatic invertebrates, Water, Human	NA	NA	NA	NA	NA	IS2404TF/TR/TP	IS2606TF/TR/TP	KRTF/KRTR/KRTP	Locus1	10.1111/j.1574-6968.2008.01328.x
Lavender et al.	2008	Relevant	Federation of European Microbiological Societies	Victoria, Australia	M. ulcerans	Aquatic invertebrates, Water, Human	NA	NA	NA	NA	NA	IS2404TF/TR/TP	IS2606TF/TR/TP	KRTF/KRTR/KRTP	Locus4	10.1111/j.1574-6968.2008.01328.x
Lavender et al.	2008	Relevant	Federation of European Microbiological Societies	Victoria, Australia	M. ulcerans	Aquatic invertebrates, Water, Human	NA	NA	NA	NA	NA	IS2404TF/TR/TP	IS2606TF/TR/TP	KRTF/KRTR/KRTP	Locus6	10.1111/j.1574-6968.2008.01328.x
Lavender et al.	2008	Relevant	Federation of European Microbiological Societies	Victoria, Australia	M. ulcerans	Aquatic invertebrates, Water, Human	NA	NA	NA	NA	NA	IS2404TF/TR/TP	IS2606TF/TR/TP	KRTF/KRTR/KRTP	Locus8	10.1111/j.1574-6968.2008.01328.x
Lavender et al.	2008	Relevant	Federation of European Microbiological Societies	Victoria, Australia	M. ulcerans	Aquatic invertebrates, Water, Human	NA	NA	NA	NA	NA	IS2404TF/TR/TP	IS2606TF/TR/TP	KRTF/KRTR/KRTP	Locus9	10.1111/j.1574-6968.2008.01328.x
Lavender et al.	2008	Relevant	Federation of European Microbiological Societies	Victoria, Australia	M. ulcerans	Aquatic invertebrates, Water, Human	NA	NA	NA	NA	NA	IS2404TF/TR/TP	IS2606TF/TR/TP	KRTF/KRTR/KRTP	Locus14	10.1111/j.1574-6968.2008.01328.x
Lavender et al.	2008	Relevant	Federation of European Microbiological Societies	Victoria, Australia	M. ulcerans	Aquatic invertebrates, Water, Human	NA	NA	NA	NA	NA	IS2404TF/TR/TP	IS2606TF/TR/TP	KRTF/KRTR/KRTP	Locus15	10.1111/j.1574-6968.2008.01328.x
Lavender et al.	2008	Relevant	Federation of European Microbiological Societies	Victoria, Australia	M. ulcerans	Aquatic invertebrates, Water, Human	NA	NA	NA	NA	NA	IS2404TF/TR/TP	IS2606TF/TR/TP	KRTF/KRTR/KRTP	Locus18	10.1111/j.1574-6968.2008.01328.x
Lavender et al.	2008	Relevant	Federation of European Microbiological Societies	Victoria, Australia	M. ulcerans	Aquatic invertebrates, Water, Human	NA	NA	NA	NA	NA	IS2404TF/TR/TP	IS2606TF/TR/TP	KRTF/KRTR/KRTP	Locus19	10.1111/j.1574-6968.2008.01328.x
Lavender et al.	2008	Relevant	Federation of European Microbiological Societies	Victoria, Australia	M. ulcerans	Aquatic invertebrates, Water, Human	NA	NA	NA	NA	NA	IS2404TF/TR/TP	IS2606TF/TR/TP	KRTF/KRTR/KRTP	ST1	10.1111/j.1574-6968.2008.01328.x
Lavender et al.	2008	Relevant	Federation of European Microbiological Societies	Victoria, Australia	M. ulcerans	Aquatic invertebrates, Water, Human	NA	NA	NA	NA	NA	IS2404TF/TR/TP	IS2606TF/TR/TP	KRTF/KRTR/KRTP	MIRU1	10.1111/j.1574-6968.2008.01328.x
Lavender et al.	2008	Relevant	Federation of European Microbiological Societies	Victoria, Australia	M. ulcerans	Aquatic invertebrates, Water, Human	NA	NA	NA	NA	NA	IS2404TF/TR/TP	IS2606TF/TR/TP	KRTF/KRTR/KRTP	MIRU9	10.1111/j.1574-6968.2008.01328.x
Lavender et al.	2008	Relevant	Federation of European Microbiological Societies	Victoria, Australia	M. ulcerans	Aquatic invertebrates, Water, Human	NA	NA	NA	NA	NA	IS2404TF/TR/TP	IS2606TF/TR/TP	KRTF/KRTR/KRTP	MIRU33	10.1111/j.1574-6968.2008.01328.x
Mosi et al.	2008	Relevant	Applied and Environmental Microbiology	Ghana, Africa	M. ulcerans	Aquatic invertebrates	NA	NA	NA	NA	KR (mlsA)	NA	NA	NA	NA	10.1128/AEM.01234-08
Pidot et al.	2008	Not relevant	BMC Genomics	Multiple	Mycobacteria	Isolates	NA	NA	NA	NA	NA	NA	NA	NA	NA	10.1186/1471-2164-9-462
Plowright et al.	2008	Not relevant	Frontiers in Ecology and the Environment	NA	NA	NA	NA	NA	NA	NA	NA	NA	NA	NA	NA	10.1890/070086
Stragier et al.	2008	Not relevant	FEMS Microbiology Letters	Belgium	Mycobacteria	NA	NA	NA	NA	NA	NA	NA	NA	NA	NA	10.1111/j.1574-6968.2008.01264.x
Wagner et al.	2008	Not relevant	EcoHealth	Benin, Africa	M. ulcerans	NA	NA	NA	NA	NA	NA	NA	NA	NA	NA	10.1007/s10393-007-0148-7
Williamson et al.	2008	Relevant	PLoS Neglected Tropical Diseases	Ghana, Africa	M. ulcerans	Aquatic invertebrates, Human tissues	NA	MU5/MU6	NA	NA	KR (mlsA)	NA	NA	NA	MIRU1	10.1371/journal.pntd.0000205
Williamson et al.	2008	Relevant	PLoS Neglected Tropical Diseases	Ghana, Africa	M. ulcerans	Aquatic invertebrates, Human tissues	NA	MU5/MU6	NA	NA	KR (mlsA)	NA	NA	NA	Locus4	10.1371/journal.pntd.0000205
Williamson et al.	2008	Relevant	PLoS Neglected Tropical Diseases	Ghana, Africa	M. ulcerans	Aquatic invertebrates, Human tissues	NA	MU5/MU6	NA	NA	KR (mlsA)	NA	NA	NA	Locus6	10.1371/journal.pntd.0000205
Williamson et al.	2008	Relevant	PLoS Neglected Tropical Diseases	Ghana, Africa	M. ulcerans	Aquatic invertebrates, Human tissues	NA	MU5/MU6	NA	NA	KR (mlsA)	NA	NA	NA	Locus8	10.1371/journal.pntd.0000205
Williamson et al.	2008	Relevant	PLoS Neglected Tropical Diseases	Ghana, Africa	M. ulcerans	Aquatic invertebrates, Human tissues	NA	MU5/MU6	NA	NA	KR (mlsA)	NA	NA	NA	Locus14	10.1371/journal.pntd.0000205
Williamson et al.	2008	Relevant	PLoS Neglected Tropical Diseases	Ghana, Africa	M. ulcerans	Aquatic invertebrates, Human tissues	NA	MU5/MU6	NA	NA	KR (mlsA)	NA	NA	NA	Locus15	10.1371/journal.pntd.0000205
Williamson et al.	2008	Relevant	PLoS Neglected Tropical Diseases	Ghana, Africa	M. ulcerans	Aquatic invertebrates, Human tissues	NA	MU5/MU6	NA	NA	KR (mlsA)	NA	NA	NA	Locus18	10.1371/journal.pntd.0000205
Williamson et al.	2008	Relevant	PLoS Neglected Tropical Diseases	Ghana, Africa	M. ulcerans	Aquatic invertebrates, Human tissues	NA	MU5/MU6	NA	NA	KR (mlsA)	NA	NA	NA	Locus19	10.1371/journal.pntd.0000205
Williamson et al.	2008	Relevant	PLoS Neglected Tropical Diseases	Ghana, Africa	M. ulcerans	Aquatic invertebrates, Human tissues	NA	MU5/MU6	NA	NA	KR (mlsA)	NA	NA	NA	ST1	10.1371/journal.pntd.0000205
Williamson et al.	2008	Relevant	PLoS Neglected Tropical Diseases	Ghana, Africa	M. ulcerans	Aquatic invertebrates, Human tissues	NA	MU5/MU6	NA	NA	KR (mlsA)	NA	NA	NA	MIRU9	10.1371/journal.pntd.0000205
Comas et al.	2009	Not relevant	PLoS ONE	None	M. tuberculosis	NA	NA	NA	NA	NA	NA	NA	NA	NA	NA	10.1371/journal.pone.0007815
Demangel et al.	2009	Not relevant	Nature Reviews Microbiology	NA	NA	NA	NA	NA	NA	NA	NA	NA	NA	NA	NA	10.1038/nrmicro2077
Durnez et al.	2009	Relevant	Journal of Microbiological Methods	Uganda, Africa	M. ulcerans	Algae, Plants, Faeces,Insects	NA	PGP1/PGP3	NA	NA	NA	NA	NA	NA	MIRU1	10.1016/j.mimet.2008.10.002
Durnez et al.	2009	Relevant	Journal of Microbiological Methods	Uganda, Africa	M. ulcerans	Algae, Plants, Faeces,Insects	NA	PGP1/PGP4	NA	NA	NA	NA	NA	NA	MIRU5	10.1016/j.mimet.2008.10.002
Durnez et al.	2009	Relevant	Journal of Microbiological Methods	Uganda, Africa	M. ulcerans	Algae, Plants, Faeces,Insects	NA	PGP1/PGP5	NA	NA	NA	NA	NA	NA	Locus6	10.1016/j.mimet.2008.10.002
Käser et al.	2009	Not relevant	BMC Evolutionary Biology	Multiple	M. ulcerans	Isolates	NA	NA	NA	NA	NA	NA	NA	NA	NA	﻿10.1186/1471-2148-7-177
Kee et al.	2009	Not relevant	Chonnam Medical Journal	Multiple	Mycobacteria	Isolates	NA	NA	NA	NA	NA	NA	NA	NA	NA	10.4068/cmj.2009.45.1.19
McGann et al.	2009	Relevant	Emerging Infectious Diseases	Brazil	M. ulcerans	Swabs	NA	MU5/MU6	NA	NA	NA	NA	NA	NA	NA	10.3201/eid1511.090460
Ortiz et al.	2009	Not relevant	Clinical and Experimental Immunology	Multiple	M. ulcerans	Mices	NA	NA	NA	NA	NA	NA	NA	NA	NA	﻿10.1111/j.1365-2249.2009.03941.x
Portaels et al.	2009	Not relevant	Clinics in Dermatology	NA	M. ulcerans	NA	NA	NA	NA	NA	NA	NA	NA	NA	NA	10.1016/j.clindermatol.2008.09.021
Qi et al.	2009	Not relevant	PLoS Pathogens	Multiple	M. ulcerans	NA	NA	NA	NA	NA	NA	NA	NA	NA	NA	﻿10.1371/journal.ppat.1000580
Suykerbuyk et al.	2009	Relevant	The American Society of Tropical Medicine and Hygiene	Congo	M. ulcerans	Swabs	NA	MU1/MU2	NA	NA	NA	NA	NA	NA	NA	10.4269/ajtmh.2009.09-0049
Käser et al.	2009	Relevant	Applied and Environmental Microbiology	Multiple	Mycobacteria	Isolates	NA	MU5/MU6	MK289/MK263	NA	NA	NA	NA	NA	NA	10.1128/AEM.01358-08
Coulibaly et al.	2010	Not relevant	Bulletin de la Société de pathologie exotique	Côte d'Ivoire, Africa	M. ulcerans	Biopsy	NA	MU1/MU2; PGP3/PGP4	NA	NA	NA	NA	NA	NA	NA	10.1007/s13149-009-0002-y	Nested-PCR
Fyfe et al.	2010	Relevant	PLoS Neglected Tropical Diseases	Australia	M. ulcerans	Aquatic invertebrates, Mammals	NA	NA	NA	NA	NA	IS2404TF/TR/TP	IS2606TF/TR/TP	KRTF/KRTR/KRTP	NA	10.1371/journal.pntd.0000791
Marion et al.	2010	Relevant	PLoS Neglected Tropical Diseases	Cameroon, Africa	M. ulcerans	Aquatic invertebrates	NA	NA	NA	NA	NA	F1/R1/P1	NA	KRTF/KRTR/KRTP	NA	10.1371/journal.pntd.0000731
Merritt et al.	2010	Not relevant	PLoS Neglected Tropical Diseases	NA	M. ulcerans	NA	NA	NA	NA	NA	NA	NA	NA	NA	NA	10.1371/journal.pntd.0000911
Pidot et al.	2010	Not relevant	PLoS Neglected Tropical Diseases	NA	M. ulcerans	NA	NA	NA	NA	NA	NA	NA	NA	NA	NA	﻿10.1371/journal.pntd.0000663
Röltgen et al.	2010	Not relevant	PLoS Neglected Tropical Diseases	Multiple	M. ulcerans	Isolates	NA	NA	NA	NA	NA	NA	NA	NA	NA	10.1371/journal.pntd.0000751
Vandelannoote et al.	2010	Relevant	Federation of European Microbiological Societies	Ghana, Africa	M. ulcerans	Water, Soil, Plants, Animals	NA	NA	NA	NA	NA	IS2404TF/TR/TP	IS2606TF/TR/TP	KRTF/KRTR/KRTP	NA	10.1128/AEM.02774-13.
Wallace et al.	2010	Relevant	Applied and Environmental Microbiology	Australia	M. ulcerans	Isolates	NA	NA	NA	NA	KR (mlsA)	NA	NA	NA	NA	10.1128/AEM.00340-10
Landier et al.	2011	Relevant	PLoS Neglected Tropical Diseases	Cameroon, Africa	M. ulcerans	Swabs	NA	MU5/MU6	NA	NA	NA	NA	NA	NA	NA	10.1371/journal.pntd.0001392
Lavender et al.	2011	Relevant	PLoS Neglected Tropical Diseases	Australia	M. ulcerans	Mosquitoes	NA	NA	NA	NA	NA	IS2404TF/TR/TP	IS2606TF/TR/TP	KRTF/KRTR/KRTP	NA	10.1371/journal.pntd.0001305
Marion et al.	2011	Relevant	Emerging Infectious Diseases	Cameroon, Africa	M. ulcerans	Water bugs	NA	MU1/MU2	NA	NA	NA	NA	NA	NA	NA	10.3201/eid1703091859
Nakanaga et al.	2011	Not relevant	Journal of Clinical Microbiology	Japan	M. ulcerans	Isolates	NA	PU4F	NA	NA	NA	NA	NA	NA	NA	﻿10.1128/JCM.00783-11
Ngazoa-Kakou	2011	Relevant	African Journal of Microbiology Research	Côte d'Ivoire, Africa	M. ulcerans	Biopsy	NA	NA	NA	NA	NA	F1/R1/P1	NA	KRTF/KRTR/KRTP	NA	10.5897/AJMR10.767
Sakagushi et al.	2011	Not relevant	Journal of Veterinary Medical Science	India	M. ulcerans	Biopsy (turtle)	NA	MU1/MU2; PGP3/PGP4	NA	NA	NA	NA	NA	NA	NA	10.1292/jvms.10-0386	Nested-PCR
Doig et al.	2012	Not relevant	BMC Genomics	NA	M. ulcerans	NA	NA	NA	NA	NA	NA	NA	NA	NA	NA	10.1186/1471-2164-13-258
Gryseels et al.	2012	Relevant	PLoS Neglected Tropical Diseases	Multiple	M. ulcerans	Amoebae, Water, Biofilm	NA	NA	NA	NA	NA	IS2404TF/TR/TP	IS2606TF/TR/TP	KRTF/KRTR/KRTP	NA	10.1371/journal.pntd.0001764
Lavender et al.	2012	Relevant	Journal of Clinical Microbiology	Australia	M. ulcerans	Biopsy	NA	NA	NA	NA	NA	IS2404TF/TR/TP	NA	NA	Locus9	10.1128/JCM.01324-12
Lavender et al.	2012	Relevant	Journal of Clinical Microbiology	Australia	M. ulcerans	Biopsy	NA	NA	NA	NA	NA	IS2404TF/TR/TP	NA	NA	MUVNTR19SNP	10.1128/JCM.01324-12
Mosi et al.	2012	Relevant	Microbes and Infection	Ghana, Africa	M. ulcerans	Strains	NA	NA	NA	NA	KR (mlsA)	NA	NA	NA	NA	10.1016/j.micinf.2012.02.009
Röltgen et al.	2012	Not relevant	PLoS Neglected Tropical Diseases	Ghana, Africa	M. ulcerans	Biopsy	NA	NA	NA	NA	NA	NA	NA	NA	NA	10.1371/journal.pntd.0001904
Van Ravensway et al.	2012	Not relevant	PLoS ONE	Victoria, Australia	M. ulcerans	NA	NA	NA	NA		NA	NA	NA	NA	NA	10.1371/journal.pone.0051074
Williamson et al.	2012	Relevant	PLoS Neglected Tropical Diseases	Benin, Africa	M. ulcerans	Biopsy	NA	NA	NA	NA	NA	IS2404TF/TR/TP	NA	NA	NA	10.1371/journal.pntd.0001506
Yeboah-Manu et al.	2012	Relevant	PLoS Neglected Tropical Diseases	Ghana, Africa	M. ulcerans	Biopsy	NA	NA	NA	NA	NA	IS2404TF/TR/TP	IS2606TF/TR/TP	KRTF/KRTR/KRTP	NA	10.1371/journal.pntd.0001460
Yotsu et al.	2012	Not relevant	Journal of Dermatology	Japan	M. ulcerans	NA	NA	NA	NA	NA	NA	NA	NA	NA	NA	10.1111/j.1346-8138.2012.01543.x
Tobias et al.	2012	Not relevant	Journal of Bacteriology	America	M. liflandii	Isolates	NA	MU3/MU4; MU5/MU6	MU7/MU8	NA	NA	NA	NA	NA	NA	10.1128/JB.02132-12
Guenin-Macé et al.	2013	Not relevant	The Journal of Clinical Investigation	NA	M. ulcerans	NA	NA	NA	NA	NA	NA	NA	NA	NA	NA	10.1172/JCI66576
Deshayes et al.	2013	Relevant	PLoS Neglected Tropical Diseases	Benin, Africa	M. ulcerans	Tissues	NA	NA	NA	NA	NA	F1/R1/P1	NA	KRTF/KRTR/KRTP	NA	10.1371/journal.pntd.0002502
Henningan et al.	2013	Relevant	Applied and Environmental Microbiology	Southern Louisiana, America	M. ulcerans	Water, Aquatic vegetation	NA	MU1/MU2	NA	NA	NA	NA	NA	NA	NA	10.1128/AEM.03543-12.
O'Brien et al.	2013	Not relevant	AIDS	Multiple	M. ulcerans	NA	NA	NA	NA	NA	NA	NA	NA	NA	NA	10.1097/QAD.0b013e32836268f4
Radomski et al.	2013	Not relevant	PLoS ONE	NA	M. avium	NA	NA	NA	NA	NA	NA	NA	NA	NA	NA	10.1371/journal.pone.0078749
Trubiano et al.	2013	Not relevant	PLoS Neglected Tropical Diseases	Victoria, Australia	M. ulcerans	Biopsy	NA	NA	NA	NA	NA	NA	NA	NA	NA	10.1371/journal.pntd.0002463
Willson et al.	2013	Relevant	Infection Ecology & Epidemiology	Ghana, Africa	M. ulcerans	Aquatic invertebrates	NA	NA	NA	NA	KR (mlsA)	NA	NA	NA	NA	10.3402/iee.v3i0.19946
Amissah et al.	2014	Relevant	PLoS Neglected Tropical Diseases	Ghana, Africa	M. ulcerans	Water, Human	NA	NA	NA	NA	NA	IS2404TF/TR/TP	IS2606TF/TR/TP	KRTF/KRTR/KRTP	NA	10.1371/journal.pntd.0003148
Benbow et al.	2014	Relevant	EcoHealth	Ghana, Africa	M. ulcerans	Biofim, Water	NA	NA	NA	NA	KR (mlsA)	NA	NA	NA	MIRU1	10.1007/s10393-013-0886-7
Benbow et al.	2014	Relevant	EcoHealth	Ghana, Africa	M. ulcerans	Biofim, Water	NA	NA	NA	NA	KR (mlsA)	NA	NA	NA	Locus6	10.1007/s10393-013-0886-7
Benbow et al.	2014	Relevant	EcoHealth	Ghana, Africa	M. ulcerans	Biofim, Water	NA	NA	NA	NA	KR (mlsA)	NA	NA	NA	ST1	10.1007/s10393-013-0886-7
Benbow et al.	2014	Relevant	EcoHealth	Ghana, Africa	M. ulcerans	Biofim, Water	NA	NA	NA	NA	KR (mlsA)	NA	NA	NA	Locus19	10.1007/s10393-013-0886-7
Bratschi et al.	2014	Relevant	PLoS Neglected Tropical Diseases	Cameroon, Africa	M. ulcerans	Water, Huma, tissues	NA	NA	NA	NA	NA	IS2404TF/TR/TP	IS2606TF/TR/TP	KRTF/KRTR/KRTP	NA	10.1371/journal.pntd.0002756
Carolan et al.	2014	Relevant	PLoS Neglected Tropical Diseases	Cameroon, Africa	M. ulcerans	Aquatic invertebrates	NA	NA	NA	NA	NA	F1/R1/P1	NA	KRTF/KRTR/KRTP	NA	10.1371/journal.pntd.0003298
Carolan et al.	2014	Not relevant	International Journal of Health Geographics	Cameroon, Africa	M. ulcerans	NA	NA	NA	NA	NA	NA	NA	NA	NA	NA	10.1186/1476-072X-13-44
Carson et al.	2014	Relevant	PLoS Neglected Tropical Diseases	Australia	M. ulcerans	Faeces	NA	NA	NA	NA	NA	IS2404TF/TR/TP	IS2606TF/TR/TP	KRTF/KRTR/KRTP	NA	10.1371/journal.pntd.0002668
Converse et al.	2014	Not relevant	PLoS Neglected Tropical Diseases	Malaysia	M. ulcerans	Isolates	NA	NA	NA		NA	NA	NA	NA	NA	10.1371/journal.pntd.0002618
Eddyani et al.	2014	Relevant	PLoS ONE	Victoria, Australia	M. ulcerans	Soil, Leaf litter, Detritus	NA	NA	NA	NA	NA	IS2404TF/TR/TP	IS2606TF/TR/TP	KRTF/KRTR/KRTP	NA	10.1371/journal.pone.0089407
Garchitonera et al.	2014	Relevant	PLoS Neglected Tropical Diseases	Cameroon, Africa	M. ulcerans	Aquatic invertebrates	NA	NA	NA	NA	NA	F1/R1/P1	NA	KRTF/KRTR/KRTP	NA	10.1371/journal.pntd.0002879
Kenu et al.	2014	Not relevant	PLoS Neglected Tropical Diseases	Ghana, Africa	M. ulcerans	NA	NA	NA	NA	NA	NA	NA	NA	NA	NA	10.1371/journal.pntd.0003279
Landier et al.	2014	Relevant	PLoS Neglected Tropical Diseases	Cameroon, Africa	M. ulcerans	Swabs	NA	NA	NA	NA	NA	IS2404TF/TR/TP	NA	NA	NA	10.1371/journal.pntd.0003123
Marion et al.	2014	Relevant	Journal of Clinical Microbiology	Benin, Africa	M. ulcerans	Biopsy	NA	NA	NA	NA	NA	F1/R1/P1	NA	NA	NA	10.1128/JCM.02131-14
McIntosh et al.	2014	Relevant	EcoHealth	Ghana, Africa	M. ulcerans	Water	NA	NA	NA	NA	NA	MU5/MU6/MUCAP1	NA	NA	MIRU1	10.1007/s10393-013-0898-3
McIntosh et al.	2014	Relevant	EcoHealth	Ghana, Africa	M. ulcerans	Water	NA	NA	NA	NA	NA	MU5/MU6/MUCAP2	NA	NA	Locus4	10.1007/s10393-013-0898-3
McIntosh et al.	2014	Relevant	EcoHealth	Ghana, Africa	M. ulcerans	Water	NA	NA	NA	NA	NA	MU5/MU6/MUCAP3	NA	NA	Locus6	10.1007/s10393-013-0898-3
McIntosh et al.	2014	Relevant	EcoHealth	Ghana, Africa	M. ulcerans	Water	NA	NA	NA	NA	NA	MU5/MU6/MUCAP4	NA	NA	Locus8	10.1007/s10393-013-0898-3
McIntosh et al.	2014	Relevant	EcoHealth	Ghana, Africa	M. ulcerans	Water	NA	NA	NA	NA	NA	MU5/MU6/MUCAP5	NA	NA	MIRU9	10.1007/s10393-013-0898-3
McIntosh et al.	2014	Relevant	EcoHealth	Ghana, Africa	M. ulcerans	Water	NA	NA	NA	NA	NA	MU5/MU6/MUCAP6	NA	NA	Locus14	10.1007/s10393-013-0898-3
McIntosh et al.	2014	Relevant	EcoHealth	Ghana, Africa	M. ulcerans	Water	NA	NA	NA	NA	NA	MU5/MU6/MUCAP7	NA	NA	Locus15	10.1007/s10393-013-0898-3
McIntosh et al.	2014	Relevant	EcoHealth	Ghana, Africa	M. ulcerans	Water	NA	NA	NA	NA	NA	MU5/MU6/MUCAP8	NA	NA	Locus18	10.1007/s10393-013-0898-3
McIntosh et al.	2014	Relevant	EcoHealth	Ghana, Africa	M. ulcerans	Water	NA	NA	NA	NA	NA	MU5/MU6/MUCAP9	NA	NA	Locus19	10.1007/s10393-013-0898-3
McIntosh et al.	2014	Relevant	EcoHealth	Ghana, Africa	M. ulcerans	Water	NA	NA	NA	NA	NA	MU5/MU6/MUCAP10	NA	NA	ST1	10.1007/s10393-013-0898-3
Morris et al.	2014	Relevant	PLoS Neglected Tropical Diseases	French Guiana, South America	M. ulcerans	Water, Soil, Sediments, Detritus	NA	NA	NA	NA	NA	IS2404TF/TR/TP	NA	KRTF/KRTR/KRTP	NA	10.1371/journal.pntd.0002660
Morris et al.	2014	Not relevant	Emerging Microbes and Infections	French Guiana, South America	M. ulcerans	NA	NA	NA	NA	NA	NA	NA	NA	NA	NA	10.1038/emi.2014.56
Narh et al.	2014	Not relevant	Mycobacterial Diseases	NA	Mycobacteria	NA	NA	NA	NA	NA	NA	NA	NA	NA	MIRU1	10.4172/2161-1068.1000149
O'Brien et al.	2014	Not relevant	Tropical Medicine and International Health	NA	M. ulcerans	NA	NA	NA	NA	NA	NA	NA	NA	NA	NA	10.1111/tmi.12342
O'Brien et al.	2014	Relevant	PLoS Neglected Tropical Diseases	Australia	M. ulcerans	Animal biopsy	NA	MU1/MU2	NA	NA	NA	IS2404TF/TR/TP	NA	NA	NA	10.1371/journal.pntd.0002666
Vincent et al.	2014	Not relevant	The Lancet Global Health	Benin, Africa	M. ulcerans	Biopsy	NA	NA	NA	NA	NA	NA	NA	NA	NA	10.1016/S2214-109X(14)70223-2
Takemura et al.	2014	Not relevant	Frontiers in Microbiology	Cameroon, Africa	NA	NA	NA	NA	NA	NA	NA	NA	NA	NA	NA	10.3389/fmicb.2014.00038
Vandelannoote et al.	2014	Relevant	Applied and Environmental Microbiology	Africa	M. ulcerans	Swabs	NA	RD1_SENSE /RD1_ANTI_SENSE	NA	NA	NA	IS2404TF/TR/TP	IS2606TF/TR/TP	KRTF/KRTR/KRTP	NA	10.1128/AEM.02774-13
Vandelannoote et al.	2014	Relevant	Applied and Environmental Microbiology	Africa	M. ulcerans	Swabs	NA	RD12_SENSE/RD12_ANTI_SENSE	NA	NA	NA	IS2404TF/TR/TP	IS2606TF/TR/TP	KRTF/KRTR/KRTP	NA	10.1128/AEM.02774-13
Williamson et al	2014	Relevant	PLoS Neglected Tropical Diseases	Africa	M. ulcerans	Guinea pig	NA	NA	NA	NA	NA	IS2404TF/TR/TP	NA	NA	NA	﻿10.1371/journal.pntd.0002770
Williamson et al	2014	Relevant	PLoS ONE	Ghana, Africa	M. ulcerans	Isolates	NA	NA	NA	NA	NA	NA	NA	NA	MIRU1	10.1371/journal.pone.0088007
Williamson et al	2014	Relevant	PLoS ONE	Ghana, Africa	M. ulcerans	Isolates	NA	NA	NA	NA	NA	NA	NA	NA	Locus6	10.1371/journal.pone.0088007
Williamson et al	2014	Relevant	PLoS ONE	Ghana, Africa	M. ulcerans	Isolates	NA	NA	NA	NA	NA	NA	NA	NA	ST1	10.1371/journal.pone.0088007
Williamson et al	2014	Relevant	PLoS ONE	Ghana, Africa	M. ulcerans	Isolates	NA	NA	NA	NA	NA	NA	NA	NA	Locus19	10.1371/journal.pone.0088007
Ablordey et al.	2015	Relevant	PLoS Neglected Tropical Diseases	Multiple	M. ulcerans	Tissues	NA	MU1/MU2	NA	NA	NA	NA	NA	NA	NA	10.1371/journal.pntd.0003681
Andreoli et al.	2015	Relevant	PLoS Neglected Tropical Diseases	Cameroon, Africa	M. ulcerans	Biopsy	NA	NA	NA	NA	NA	IS2404TF/TR/TP	NA	NA	NA	10.1371/journal.pntd.0004102
Babonneau et al.	2015	Relevant	PLoS Neglected Tropical Diseases	None	M. ulcerans	Biopsy	NA		NA	NA	NA	F1/R1/P1	NA	NA	NA	10.1371/journal.pntd.0003606
Campbell et al.	2015	Not relevant	NA	NA	NA	NA	NA	NA	NA	NA	NA	NA	NA	NA	NA	10.1371/journal.pntd.0004123
Dreyer et al.	2015	Not relevant	PLoS Neglected Tropical Diseases	Multiple	M. ulcerans	Biopsy	NA	NA	NA	NA	NA	NA	NA	NA	NA	10.1371/journal.pntd.0003477
Garchitorena et al	2015	Not relevant	Proceedings Biological Sciences / The Royal Society	Africa	M. ulcerans	NA	NA	NA	NA	NA	NA	NA	NA	NA	NA	10.1098/rspb.2015.1426
Garchitorena et al.	2015	Relevant	eLife	Cameroon, Africa	M. ulcerans	Aquatic invertebrates	NA	NA	NA	NA	NA	F1/R1/P1	NA	KRTF/KRTR/KRTP	NA	﻿10.7554/eLife.07616
Garchitorena et al.	2015	Relevant	Scientific Reports	Cameroon, Africa	M. ulcerans	Aquatic invertebrates	NA	NA	NA	NA	NA	F1/R1/P1	NA	KRTF/KRTR/KRTP	NA	﻿10.1038/srep18055
Giles-Vernick et al.	2015	Not relevant	Social Science & Medicine	Cameroon, Africa	M. ulcerans	NA	NA	NA	NA	NA	NA	NA	NA	NA	NA	10.1016/j.socscimed.2014.03.008
Hagarty et al.	2015	Not relevant	Journal of Hydrology	Ghana, Africa	M. ulcerans	NA	NA	NA	NA	NA	NA	NA	NA	NA	NA	10.1016/j.ejrh.2015.03.006
Kumar et al.	2015	Not relevant	The International Journal of Lower Extremity Wounds	NA	M. ulcerans	NA	NA	NA	NA	NA	NA	NA	NA	NA	NA	﻿10.1371/journal.pntd.
Landier et al.	2015	Not relevant	Emerging Infectious Diseases	Africa	M. ulcerans	NA	NA	NA	NA	NA	NA	NA	NA	NA	NA	10.3201/eid2108.141336
Narh et al.	2015	Relevant	PLoS Neglected Tropical Diseases	Ghana, Africa	M. ulcerans	Biopsy, Soil, Water, Detritus	16S rRNA	PGP1/PGP2; PGP3/PGP4	NA		KR (mlsA)	NA	NA		Locus 6	10.1371/journal.pntd.0003437
Narh et al.	2015	Relevant	PLoS Neglected Tropical Diseases	Ghana, Africa	M. ulcerans	Biopsy, Soil, Water, Detritus	16S rRNA	PGP1/PGP2; PGP3/PGP4	NA		KR (mlsA)	NA	NA		Locus 19	10.1371/journal.pntd.0003437
Narh et al.	2015	Relevant	PLoS Neglected Tropical Diseases	Ghana, Africa	M. ulcerans	Biopsy, Soil, Water, Detritus	16S rRNA	PGP1/PGP2; PGP3/PGP4	NA		KR (mlsA)	NA	NA		ST1	10.1371/journal.pntd.0003437
Narh et al.	2015	Relevant	PLoS Neglected Tropical Diseases	Ghana, Africa	M. ulcerans	Biopsy, Soil, Water, Detritus	16S rRNA	PGP1/PGP2; PGP3/PGP4	NA		KR (mlsA)	NA	NA		MIRU1	10.1371/journal.pntd.0003437
Reynaud et al.	2015	Relevant	PLoS ONE	French Guiana	M. ulcerans	Isolates	NA	NA	MU7/MU8	NA	NA	ULC5/ULC6/ULCS01	NA	KRTF/KRTR/KRTP	Locus18	10.1371/journal.pone.0118597
Reynaud et al.	2015	Relevant	PLoS ONE	French Guiana	M. ulcerans	Isolates	NA	NA	MU7/MU9	NA	NA	ULC5/ULC6/ULCS02	NA	KRTF/KRTR/KRTP	Locus19	10.1371/journal.pone.0118597
Reynaud et al.	2015	Relevant	PLoS ONE	French Guiana	M. ulcerans	Isolates	NA	NA	MU7/MU10	NA	NA	ULC5/ULC6/ULCS03	NA	KRTF/KRTR/KRTP	MIRU5	10.1371/journal.pone.0118597
Reynaud et al.	2015	Relevant	PLoS ONE	French Guiana	M. ulcerans	Isolates	NA	NA	MU7/MU11	NA	NA	ULC5/ULC6/ULCS04	NA	KRTF/KRTR/KRTP	MIRU33	10.1371/journal.pone.0118597
Reynaud et al.	2015	Relevant	PLoS ONE	French Guiana	M. ulcerans	Isolates	NA	NA	MU7/MU12	NA	NA	ULC5/ULC6/ULCS05	NA	KRTF/KRTR/KRTP	ST1	10.1371/journal.pone.0118597
Reynaud et al.	2016	Relevant	PLoS ONE	French Guiana	M. ulcerans	Isolates	NA	NA	MU7/MU13	NA	NA	ULC5/ULC6/ULCS06	NA	KRTF/KRTR/KRTP	SSR	10.1371/journal.pone.0118597
Stinear et al.	2015	Not relevant	Microbiology	NA	M. ulcerans	Isolates	NA	NA	NA	NA	NA	NA	NA	NA	NA	﻿10.1099/mic.0.27674-0
Tian et al.	2015	Relevant	American Journal of Tropical Medicine and Hygiene	Ghana, Africa	M. ulcerans	Isolates	NA	NA	NA	NA	NA	MU5/MU6/MUCAP1	MU7/MU8/MUCAP3	NA	NA	﻿10.4269/ajtmh.15-0568
Yotsu et al.	2015	Not relevant	The Journal of Dermatology	NA	M. ulcerans	NA	NA	NA	NA	NA	NA	NA	NA	NA	NA	10.1111/1346-8138.13049
Zogo et al.	2015	Relevant	PLoS Neglected Tropical Diseases	Benin, Africa	M. ulcerans	Aquatic invertebrates	NA	NA	NA	NA	NA	F1/R1/P1	NA	KRTF/KRTR/KRTP	NA	﻿10.1371/journal.pntd.0003941
Ampah et al.	2016	Not relevant	PLoS Neglected Tropical Diseases	Ghana, Africa	M. ulcerans	NA	NA	NA	NA	NA	NA	NA	NA	NA	NA	10.1371/journal.pntd.0004387
Lamelas et al.	2016	Not relevant	PLoS Neglected Tropical Diseases	Ghana, Africa	M. ulcerans	Biopsy	NA	NA	NA	NA	NA	NA	NA	NA	NA	10.1371/journal.pntd.0004856
Garcia-Pena et al.	2016	Relevant	Nordic Society Oikos	Cameroon, Africa	M. ulcerans	Aquatic invertebrates	NA	NA	NA	NA	NA	F1/R1/P1	NA	NA	NA	10.1111/oik.02700
Gcebe	2016	Not relevant	BMC Microbiology	Africa	Mycobacteria	Aquatic animals	16S rRNA gene	NA	NA	NA	NA	NA	NA	NA	NA	10.1186/s12866-018-1177-9
Henningan et al.	2013	Not relevant	Applied and Environmental Microbiology	Louisiana, America	M. ulcerans	Water, Biofilm	16S rRNA gene	MU1/MU2; PGP3/PGP4	NA	NA	NA	NA	NA	NA	NA	10.1128/AEM.03543-12	Nested-PCR
Kalvisa et al.	2016	Not relevant	Infection, Genetics & Evolution	NA	NA	NA	NA	NA	NA	NA	NA	NA	NA	NA	NA	10.1016/j.meegid.2016.05.013
Morris et al.	2016	Not relevant	Science Advances	NA	NA	NA	NA	NA	NA	NA	NA	NA	NA	NA	NA	10.1126/sciadv.1600387
Sanhueza et al.	2016	Not relevant	FEMS Microbiology Ecology	French Guiana	M. ulcerans	Isolates	NA	NA	NA	NA	NA	F1/R1/P1	NA	NA	NA	10.1093/femsec/fiw067
Shinoda et al.	2016	Relevant	Tropical Medicine and Health	Multiple	M. ulcerans	Isolates	NA	NA	NA	NA	NA	IS2404TF/TR/TP	NA	NA	NA	10.1186/s41182-016-0028-3
Shinoda et al.	2016	Relevant	Tropical Medicine and Health	Multiple	M. ulcerans	Isolates	NA	NA	NA	NA	-	IS2404/KF/KR/KP	NA	NA	NA	10.1186/s41182-016-0028-3
Tobias et al.	2016	Relevant	Peerj	Ghana, Africa	M. ulcerans	Animal faeces	NA	NA	NA	NA	NA	IS2404TF/TR/TP	NA	KRTF/KRTR/KRTP	NA	10.7717/peerj.2065
Ukwaja et al.	2016	Relevant	Infectious Diseases of Poverty	Nigeria, Africa	M. ulcerans	Biopsy	NA	MU1/MU2	NA	NA	NA	NA	NA	NA	NA	10.1186/s40249-016-0119-8
Aboagye et al.	2016	Relevant	Applied and Environmental Microbiology	Ghana, Africa	Mycobacteria	Water	NA	NA	NA	NA	KR-F/KR-R	NA	NA	NA	NA	10.1128/AEM.01002-16
Yoshida et al.	2016	Not relevant	Genome Announcement	Japan	M. shinshuense	NA	NA	NA	NA	NA	NA	NA	NA	NA	NA	10.1128/genomeA.01050-16
Douine et al.	2017	Not relevant	Lancet Planetary Health	French Guiana, South America	M. ulcerans	NA	NA	NA	NA	NA	NA	NA	NA	NA	NA	﻿10.1016/S2542-5196(17)30009-8
O'Brien	2017	Not relevant	Emerging Infectious Diseases	Australia	M. ulcerans	NA	NA	NA	NA	NA	NA	NA	NA	NA	NA	10.3201/eid2305.160809
Röltgen et al.	2017	Relevant	Emerging Infectious Diseases	Australia	M. ulcerans	Soil, Mud, Vegetation, Insects	NA	NA	NA	NA	NA	IS2404TF/TR/TP	IS2606TF/TR/TP	NA	NA	10.3201/eid2312.170780
Vandelannoote et al.	2017	Not relevant	Genome Biology and Evolution	Africa	M. ulcerans	NA	NA	NA	NA	NA	NA	NA	NA	NA	NA	10.1093/gbe/evx003
Zingue et al.	2017	Not relevant	PLoS Neglected Tropical Diseases	Africa	M. ulcerans	NA	NA	NA	NA	NA	NA	NA	NA	NA	NA	10.1371/journal.pntd.0005303
Loftus et al.	2018	Not relevant	PLoS Neglected Tropical Diseases	Australia	M. ulcerans	NA	NA	NA	NA	NA	NA	NA	NA	NA	NA	﻿10.1371/journal.pntd.0006323
Nakanaga et al.	2018	Not relevant	Scientific Reports	Multiple	M. shinshuense	NA	NA	NA	NA	NA	NA	NA	NA	NA	NA	10.1038/s41598-018-26425-1
Nguetta et al.	2018	Relevant	American Journal of Microbiological Research	Côte d'Ivoire, Africa	M. ulcerans	Tissues	NA	MU5/MU6	MU7/MU8	NA	KR (mlsA)	NA	NA	NA	MIRU1	10.12691/ajmr-6-3-3
Nguetta et al.	2018	Relevant	American Journal of Microbiological Research	Côte d'Ivoire, Africa	M. ulcerans	Tissues	NA	MU5/MU6	MU7/MU8	NA	KR (mlsA)	NA	NA	NA	Locus6	10.12691/ajmr-6-3-3
Nguetta et al.	2018	Relevant	American Journal of Microbiological Research	Côte d'Ivoire, Africa	M. ulcerans	Tissues	NA	MU5/MU6	MU7/MU8	NA	KR (mlsA)	NA	NA	NA	ST1	10.12691/ajmr-6-3-3
Nguetta et al.	2018	Relevant	American Journal of Microbiological Research	Côte d'Ivoire, Africa	M. ulcerans	Tissues	NA	MU5/MU6	MU7/MU8	NA	KR (mlsA)	NA	NA	NA	Locus19	10.12691/ajmr-6-3-3
O'Brien et al.	2018	Not relevant	Medical Journal of Australia	Australia	M. ulcerans	NA	NA	NA	NA	NA	NA	NA	NA	NA	NA	10.5694/mja17.00879
Singh et al.	2018	Relevant	Tropical Medicine and Infectious Diseases	Multiple	M. ulcerans	Animals	NA	NA	NA	NA	NA	IS2404TF/TR/TP	IS2606TF/TR/TP	KRTF/KRTR/KRTP	NA	10.3390/tropicalmed3020056
Yeboah-Manu et al.	2018	Relevant	PLoS Neglected Tropical Diseases	Ghana, Africa	M. ulcerans	Isolates	NA	MU1/MU2	NA	NA	NA	NA	NA	NA	NA	10.1371/journal.pntd.0006560
Yotsu et al.	2018	Not relevant	Current Tropical Medicine Reports	NA	M. ulcerans	NA	NA	NA	NA	NA	NA	NA	NA	NA	NA	10.1002/14651858.CD012118.pub2
Zingue et al.	2018	Relevant	Scientific Reports	Côte d'Ivoire, Africa	M. ulcerans	Water, Soil, Plants	NA	NA	NA	NA	NA	IS2404TF/TR/TP	IS2606TF/TR/TP	KRTF/KRTR/KRTP	NA	10.1038/s41598-018-25278-y
Zingue et al.	2018	Not relevant	Clinical Microbiology Reviews	NA	M. ulcerans	NA	NA	NA	NA	NA	NA	NA	NA	NA	NA	10.1128/CMR.00045-17
Bolz et al.	2019	Not relevant	Springer	NA	M. ulcerans	Animals	NA	NA	NA	NA	NA	NA	NA	NA	NA	10.1007/978-3-030-11114-4_9
Bouam et al.	2019	Relevant	BioRxiv Microbiology	NA	M. ulcerans	Plants	NA	NA	NA	NA	NA	IS2404TF/TR/TP	NA	KRTF/KRTR/KRTP	NA	10.1101/867556
Hammoudi et al.	2019	Not relevant	Scientific Reports	NA	M. ulcerans	Isolates	NA	NA	NA	NA	NA	IS2404TF/TR/TP	IS2606TF/TR/TP	KRTF/KRTR/KRTP	NA	10.1038/s41598-019-39927-3
Johnson	2019	Not relevant	Springer	NA	NA	NA	NA	NA	NA	NA	NA	NA	NA	NA	NA	10.1007/978-3-030-11114-4_3
Laso et al.	2019	Relevant	International Journal of Infectious Diseases	Peru, South America	M. ulcerans	Biopsy	NA	NA	NA	NA	NA	NA	NA	NA	Locus18	10.1016/j.ijid.2018.10.012
Laso et al.	2019	Relevant	International Journal of Infectious Diseases	Peru, South America	M. ulcerans	Biopsy	NA	NA	NA	NA	NA	NA	NA	NA	Locus19	10.1016/j.ijid.2018.10.012
Laso et al.	2019	Relevant	International Journal of Infectious Diseases	Peru, South America	M. ulcerans	Biopsy	NA	NA	NA	NA	NA	NA	NA	NA	MIRU5	10.1016/j.ijid.2018.10.012
Laso et al.	2019	Relevant	International Journal of Infectious Diseases	Peru, South America	M. ulcerans	Biopsy	NA	NA	NA	NA	NA	NA	NA	NA	MIRU33	10.1016/j.ijid.2018.10.012
Laso et al.	2019	Relevant	International Journal of Infectious Diseases	Peru, South America	M. ulcerans	Biopsy	NA	NA	NA	NA	NA	NA	NA	NA	ST1	10.1016/j.ijid.2018.10.012
Laso et al.	2019	Relevant	International Journal of Infectious Diseases	Peru, South America	M. ulcerans	Biopsy	NA	NA	NA	NA	NA	NA	NA	NA	SSR	10.1016/j.ijid.2018.10.012
Röltgen et al.	2019	Not relevant	Springer	Multiple	M. ulcerans	NA	NA	NA	NA	NA	NA	NA	NA	NA	NA	10.1007/978-3-030-11114-4_10
Pluschke et al.	2019	Not relevant	Springer	Multiple	M. ulcerans	NA	NA	NA	NA	NA	NA	NA	NA	NA	NA	10.1007/978-3-030-11114-4
Simpson et al.	2019	Not relevant	The Lancet Global Health	Multiple	M. ulcerans	Water, Soil, Plants, Animals	NA	NA	NA	NA	NA	NA	NA	NA	NA	10.1016/S2214-109X(19)30171-8
Singh et al.	2019	Relevant	International Journal of Mycobacteriology	Australia	M. ulcerans	Biopsy	NA	NA	NA	NA	NA	IS2404TF/TR/TP	IS2606TF/TR/TP	KRTF/KRTR/KRTP	NA	10.4103/ijmy.ijmy_168_18
Combe et al.	2019	Relevant	PLoS Neglected Tropical Diseases	French Guiana, South America	M. ulcerans	Water, Sediments	NA	NA	NA	NA	NA	F1/R1/P1	NA	KRTF/KRTR/KRTP	NA	10.1371/journal.pntd.0007074
Simpson et al.	2020	Not relevant	London School of Hygiene and Tropical Medicine	Africa	M. ulcerans	Biopsy	NA	NA	NA	NA	NA	NA	NA	NA	NA	10.17037/DATA.00001909
Combe et al.	2020	Relevant	British Journal of Dermatology	French Guiana, South America	M. ulcerans	Biopsy	NA	NA	NA	NA	NA	F1/R1/P1	NA	KRTF/KRTR/KRTP	NA	10.1111/bjd.19260
Hammoudi et al.	2020	Relevant	PLoS Neglected Tropical Diseases	Africa	M. ulcerans	Rhizosphere	NA	NA	NA	NA	NA	IS2404TF/TR/TP	IS2606TF/TR/TP	KRTF/KRTR/KRTP	NA	10.1371/journal.pntd.0008228
#Relevant papers
#Not relevant papers

## Sheet: Primers & Probes
Author	Year	Methodology	Target Element	Marker	Primer Forward	Sequence (5'-3')	Primer Reverse	Sequence (5'-3')	Probe	Sequence (5'-3')	Expected Amplicon size (bp)	Blast on Agy99 reference genome	Genome position (nt)	Amplicon size (bp)	% identity	% Coverage	RQ
Ross et al.	1997	PCR + SBH	AluI	IS2404	MU1	CCGTCCGACGTCTACCGTA	MU2	ACACGTCACTTCATTGACGG	See paper	See paper	568 bp	Amplicon found, reverse primer did not pass the in silico filter	-	-	-	-	-
Stinear et al.	1999	PCR	-	Between tandem copies of IS2404	MU3	CGCGTGGGTCCCTCGGGTCT	MU4	ATCGCCGAAGCCTGCCGGAT	-	-	1000 bp	Amplicon found, both primer did not pass the in silico filter	-	-	-	-	MU3: 2162 matches / MU4: 6980 matches on Agy99
Stinear et al.	1999	PCR	-	IS2404	MU5	AGCGACCCCAGTGGATTGGT	MU6	CGGTGATCAAGCGTTCACGA	-	-	492 bp	Amplicon found, both primer did not pass the in silico filter	-	-	-	-	MU5: 2320 matches / MU6: 3983 matches on Agy99
Stinear et al.	1999	PCR	-	IS2606	MU7	GGCCTGGCGGATTGCTCAAGG	MU8	CGTAGATGTGGGCGAAATGG	-	-	332 bp	Amplicon found, both primer did not pass the in silico filter	-	-	-	-	MU7: 4027 matches / MU8: 2655 matches on Agy99
Stinear et al.	2000	capture-PCR	-	IS2404	MU5	AGCGACCCCAGTGGATTGGT	MU6	CGGTGATCAAGCGTTCACGA	MUCAP1	CAGTGTTGACGCATCCAGGTCATGATCGCA	492 bp	Amplicon identical to Agy99	-	-	-	-	-
Stinear et al.	2000	capture-PCR	-	IS2606	MU7	GGCCTGGCGGATTGCTCAAGG	MU8	CGTAGATGTGGGCGAAATGG	MUCAP3	AGGACCTGTCCGAGCGCCTTGGATATGACC	332 bp	Amplicon identical to Agy99	-	-	-	-	-
Stinear et al.	2000	PCR	-	2426 (between adjacent copies of IS2404 & IS2606)	MU4	ATCGCCGAAGCCTGCCGGAT	MU9	TCTTCGTGGTTTTGTGATGGC	-	-	-	-	-	-	-	-	-
Rondini et al.	2003	qPCR (TaqMan)	-	IS2404	F1	ATTGGTGCCGATCGAGTTG	R1	TCGCTTTGGCGCGTAAA	P1	CACCACGCAGCATTCTTGCCGT	-	Amplicon found, reverse primer did not pass the in silico filter	-	58 bp	-	-	F1: 18/19 nucleotide identity; F1 6806 matches / R1 2021 matches on Agy99
Mve-Obiang et al.	2005	PCR	mlsA1 (core lactone)	Pks genes (mycolactone plasmid)	Forward	GAGATCGGTCCCGACGTCTAC	Reverse	GGCTTGACTCATGTCACGTAAGG	-	-	-	Amplicon found, both primer did not pass the in silico filter	-	-	-	-	Forward & Reverse primer partial match
Mve-Obiang et al.	2005	PCR	mlsB (fatty acid side chain)	Pks genes (mycolactone plasmid)	Forward	TGGAAGGCGTAGGTGGGCAGGTTAACTGTC	Reverse	ATCTGCGGTTGCCGCTACGCCAAGTTATG	-	-	-	-	-	-	-	-	-
Stragier et al.	2007	PCR	-	IS2404	Forward	AGGGCAGCGCGGTGATACGG	Reverse	CAGTGGATTGGTGCCGATCGAG	-	-	-	Amplicon identical to Agy99	96654 - 96947	320pb	-	-	Reverse primer partial match 20/22 nucleotide (nt 1-20) / multiple matches on the target sequence. Authors make reference to Ross et al. (1997) but primer sequences are different.
Fyfe et al.	2007	qPCR (TaqMan)	-	IS2404	IS2404 TF	AAAGCACCACGCAGCATCT	IS2404 TR	AGCGACCCCAGTGGATTG	IS2404 TP	CGTCCAACGCGATC	59 bp	Amplicon identical to Agy99	5600468 – 5600526	59pb	1	1	-
Fyfe et al.	2007	qPCR (TaqMan)	-	IS2606	IS2606 TF	CCGTCACAGACCAGGAAGAAG	IS2606 TR	TGCTGACGGAGTTGAAAAACC	IS2606 TP	TGTCGGCCACGCCG	58 bp	Amplicon identical to Agy99	5589338 – 5589395	58 bp	1	1	-
Fyfe et al.	2007	qPCR (TaqMan)	mlsA1, mlsA2, mlsB	KR-B	KR TF	TCACGGCCTGCGATATCA	KR TR	TTGTGTGGGCACTGAATTGAC	KR TP	ACCCCGAAGCACTG	65 bp	Amplicon found, both primer did not pass the in silico filter	-	-	-	-	-
Reynaud et al.	2015	qPCR (TaqMan)	-	IS2404	ULC5	GTCGCCGAGAAAAGCAATGA	ULC6	GACTTCAAGGTGGCGCAGAT	ULCS01	ATGCGATGCATACCCA	-	-	-	-	-	-	-
Shinoda et al.	2016	qPCR (TaqMan)	-	IS2404	IS2404KF	TCTCGTGTCGGTGTTC	IS2404KR	TGACGACCTGGGTATG	IS2404KP	AATGAAATTCCCTGCGT	-	-	-	-	-	-	-
Aboagye et al.	2016	PCR	mlsA1, mlsA2, mlsB	KR-B	KR-F	TTCTGTTCCCGCAGTTCTTT	KR-R	CTAGCTCGGAAGTGGTCAGC	-	-	-	-	-	-	-	-	-
#SBH: Southern Blot Hybridization

## Sheet: MIRU-VNTR
Author	Year	Methodology	Target Element	Marker	Primer Forward	Sequence (5'-3')	Primer Reverse	Sequence (5'-3')	Expected Amplicon size (bp)	Blast on Agy99	Genome position (nt)	Amplicon size (bp)	% identity	% Coverage	RQ
Stragier et al.	2005	PCR	MIRU-VNTR	MIRU1	Forward	GCTGGTTCATGCGTGGAAG	Reverse	ACGGTTGATCCTTGATGTGCT	560	Amplicon found, both primer did not pass the in silico filter	-	-	-	-	-
Stragier et al.	2005	PCR	MIRU-VNTR	MIRU2	Forward	ACGGTTGATCCTTGATGTGCT	Reverse	ACGGTTGATCCTTGATGTGCT	448	Amplicon found, forward primer did not pass the in silico filter	-	-	-	-	-
Stragier et al.	2005	PCR	MIRU-VNTR	MIRU5	Forward	CCCTGTCCATCCCTACCAGTT	Reverse	GGCAAGGTGATCGCGTCA	459	Amplicon identical to Agy99	5059721 – 5060346	626pb	1	1	-
Stragier et al.	2005	PCR	MIRU-VNTR	MIRU7	Forward	GAGGTCATCGACCGAGGGTT	Reverse	GATTGGCTTCATACGGCTTG	439	Amplicon identical to Agy99	2321400 – 2321839	440pb	1	1	Left primer is unacceptable: High hairpin stability (thermod. Approach)
Stragier et al.	2005	PCR	MIRU-VNTR	MIRU9	Forward	GCCGAAGCCTTGTTGGACG	Reverse	GGTTTCCCGCAGCATCTCG	441	Amplicon identical to Agy99	4603097 – 4603538	442pb	1	1	-
Stragier et al.	2005	PCR	MIRU-VNTR	MIRU20	Forward	CCACCAGTTCGCGTTTCCA	Reverse	GACCGCCATCGATTCCACC	893	Amplicon found, both primer did not pass the in silico filter	-	-	-	-	-
Stragier et al.	2005	PCR	MIRU-VNTR	MIRU33	Forward	CAAGACTCCCACCGACAGGC	Reverse	CGGATCGGCACGGTTCA	858	Amplicon found, both primer did not pass the in silico filter	-	-	-	-	-
Ablordey et al.	2005	PCR	VNTR	Locus1	Forward	GGCAGTGGGTGACGTCTCAGT	Reverse	TCGAGGCGATCTACACCAAGGATTA	-	Amplicon found, both primer did not pass the in silico filter	-	-	-	-	-
Ablordey et al.	2005	PCR	VNTR	Locus4	Forward	GCCTTGCTTACCGTCGTGCCAA	Reverse	CGAGCCAAGTTGGACCGTCAACACAT	-	Amplicon found, forward primer did not pass the in silico filter	-	-	-	-	-
Ablordey et al.	2005	PCR	VNTR	Locus6	Forward	GACCGTCATGTCGTTCGATCCTAGT	Reverse	GACATCGAAGAGGTGTGCCGTCT	-	Amplicon found, both primer did not pass the in silico filter	-	-	-	-	-
Ablordey et al.	2005	PCR	VNTR	Locus8	Forward	CGGATGACGTCGGAACTCTGA	Reverse	GGACGCGGTAGCACGTTTTGT	-	Amplicon found, both primer did not pass the in silico filter	-	-	-	-	-
Ablordey et al.	2005	PCR	VNTR	Locus9	Forward	GGTGGATCTCCGCGTCATTTG	Reverse	CGACCGCCCTCGAGACAG	-	Amplicon found, both primer did not pass the in silico filter	-	-	-	-	-
Ablordey et al.	2005	PCR	VNTR	Locus10	Forward	ACAAGCCACGGCGAGATATAG	Reverse	GCGGGGCTTTTATCTGCTTA	-	Amplicon found, both primer did not pass the in silico filter	-	-	-	-	-
Ablordey et al.	2005	PCR	VNTR	Locus13	Forward	CAGGTATTCCAGGAGATCAAA	Reverse	GGCGACAAGGCTCGTT	-	Amplicon found, both primer did not pass the in silico filter	-	-	-	-	-
Ablordey et al.	2005	PCR	VNTR	Locus14	Forward	CCTTGTATCCGAGTTTCAGTT	Reverse	GTCGACCAGATATGAGCAAT	-	Amplicon identical to Agy99	3143692 – 3144325	634pb	1	1	Left primer is unacceptable: Tm too low; Right primer is unacceptable: Tm too low
Ablordey et al.	2005	PCR	VNTR	Locus15	Forward	GCCACCGGTCAGGTCAGGTT	Reverse	TCACCAACTACGACGGCGTTC	-	Amplicon identical to Agy99	101107 – 101653	547pb	1	1	Left primer is unacceptable: Tm too high/High hairpin stability (thermod. approach); Right primer is unacceptable: High hairpin stability (thermod. approach)
Ablordey et al.	2005	PCR	VNTR	Locus16	Forward	CCAACGCTCCCCCAACCAT	Reverse	GCTCACAGGCCTTCGCTCAGA	-	Amplicon found, both primer did not pass the in silico filter	-	-	-	-	-
Ablordey et al.	2005	PCR	VNTR	Locus18	Forward	CCCGGAATTGCTGATCGTGTA	Reverse	GGTGCGCAGACTGGGTCTTA	-	Amplicon found, both primer did not pass the in silico filter	-	-	-	-	-
Ablordey et al.	2005	PCR	VNTR	Locus19	Forward	CCGACGGATGAATCTGTAGGT	Reverse	TGGCGACGATCGAGTCTC	-	Amplicon identical to Agy99	4981426 – 4981769	344pb	1	1	-
Hilty et al.	2006	PCR	VNTR	ST1	Forward	CTGAGGGGATTTCACGACCAG	Reverse	CGCCACCCGCGGACACAGTCG	-	Amplicon identical to Agy99	1781800 – 1782223	424pb	1	1	Right primer is unacceptable: Tm too high/High hairpin stability (thermod. approach)
Stragier et al.	2007	PCR	VNTR	Locus6	Forward	GACCGTCATGTCGTTCGATCCTAGT	Reverse	GACATCGAAGAGGTGTGCCGTCT	-	Amplicon identical to Agy99	2147113 – 2146630	483pb	1	1	-
Ablordey et al.	2007	PCR	VNTR	SSR		GCCGTTCCCCACCATAAC		ATCATCCAGCTTGCCCAT		-
Hilty et al.	2007	PCR	VNTR	Locus1	Forward	CATAGCCACGTGACCAATGT	Reverse	GTGAGCAGGGCATCTACCAG	232	-	-	-	-	-	-
Hilty et al.	2007	PCR	VNTR	Locus2	Forward	TGGTGTGGTTGCGTCTTCT	Reverse	GGACAAAGACGCGAGAAAGT	238	-	-	-	-	-	-
Hilty et al.	2007	PCR	VNTR	Locus3	Forward	AAGATCATTCTGCCGCTCAT	Reverse	CACAACCGAAGATCAACACG	236	-	-	-	-	-	-
Hilty et al.	2007	PCR	VNTR	Locus4	Forward	CGTTGTGACACGTCATCCAT	Reverse	GTTCCGGTCTGCGATACTGT	185	-	-	-	-	-	-
Hilty et al.	2007	PCR	VNTR	Locus5	Forward	CAACCTCGTCGAGATCAACC	Reverse	AAGGTGACGCAAGCAATGTT	362	-	-	-	-	-	-
Hilty et al.	2007	PCR	VNTR	Locus6	Forward	GCGGGGTATCTGACCAATAG	Reverse	GTGACGATGCCGAAAATGAT	388	-	-	-	-	-	-
Hilty et al.	2007	PCR	VNTR	Locus7	Forward	CTTTCTCCATGCGGGAGTT	Reverse	TCGTTGCTGTCACCAGACTC	232	-	-	-	-	-	-
Hilty et al.	2007	PCR	VNTR	Locus8	Forward	CTTCCCATCAATGGTTTTGG	Reverse	GCCCGGTGAACCAACTACTA	304	-	-	-	-	-	-
Hilty et al.	2007	PCR	VNTR	Locus9	Forward	CGCACTGGTGAGTCTGGATA	Reverse	GGCATCCAACTTGACTGACA	160	-	-	-	-	-	-
Hilty et al.	2007	PCR	VNTR	Locus10	Forward	CATCGCCACAAGTGTTTTCA	Reverse	TTCGGTTCCTTTCACATGGT	278	-	-	-	-	-	-
Hilty et al.	2007	PCR	VNTR	Locus11	Forward	AAACGACATCGACCAGACG	Reverse	CCGAGTCGAAGTTGGTATGC	194	-	-	-	-	-	-
Hilty et al.	2007	PCR	VNTR	Locus12	Forward	CCGCATACGATCTGTTCAGT	Reverse	ACCGAAAGTCCAGGGTTCTT	189	-	-	-	-	-	-
Hilty et al.	2007	PCR	VNTR	Locus13	Forward	AACTCCGGGATTGGTTCTTT	Reverse	AACGTCGTCTGTTTCGGTTC	317	-	-	-	-	-	-
Hilty et al.	2007	PCR	VNTR	Locus14	Forward	GACCGTAAACCGACGAAAAA	Reverse	CACTAATATGCGGTGCGTTC	325	-	-	-	-	-	-
Hilty et al.	2007	PCR	VNTR	Locus15	Forward	CCGTAGATGGTCTGGATGC	Reverse	CCCGAACCTATCTCGATGAC	228	-	-	-	-	-	-
Hilty et al.	2007	PCR	VNTR	Locus16	Forward	ATGCAACCACTTGCCCATC	Reverse	AGCAGTTCTTCGGTGACGAC	352	-	-	-	-	-	-
Hilty et al.	2007	PCR	VNTR	Locus17	Forward	GTTATCACCCGATTGCCAGT	Reverse	AAACAACGACTTTCGCGTCT	304	-	-	-	-	-	-
Hilty et al.	2007	PCR	VNTR	Locus18	Forward	AGGTCGACTTCGTGCTCAAC	Reverse	ATGGGCGTAGGTCCAAAAT	250	-	-	-	-	-	-
Hilty et al.	2007	PCR	VNTR	Locus19	Forward	AGGATCGCCTTCTTGTTTCC	Reverse	TGCAGTGCATCGTTCATACC	224	-	-	-	-	-	-
Hilty et al.	2007	PCR	VNTR	Locus20	Forward	TGAGTTGGCCCAGTCGAG	Reverse	GACAAGCCGGCCAACATC	250	-	-	-	-	-	-
Hilty et al.	2007	PCR	VNTR	Locus21	Forward	GTCACCGTCAACATCACGTC	Reverse	GGTCAGCACGTTTTCATGC	279	-	-	-	-	-	-
Hilty et al.	2007	PCR	VNTR	Locus22	Forward	GTATGCGCGACTGATCCAC	Reverse	CCGTTTGGCTATCCGATAAA	313	-	-	-	-	-	-
Hilty et al.	2007	PCR	VNTR	Locus23	Forward	GGACCGACTGTTGATGGTTT	Reverse	TGGAGTCCAGGAAGAACTCG	182	-	-	-	-	-	-
Hilty et al.	2007	PCR	VNTR	Locus24	Forward	GAAGCCCATCGTGTCTGC	Reverse	CTTACCTGGGCGATGAGTGT	315	-	-	-	-	-	-
Hilty et al.	2007	PCR	VNTR	Locus25	Forward	CAGCAGGTCCGCTATGAAGT	Reverse	GTCGTTGAAGGGGTGACACT	355	-	-	-	-	-	-
Hilty et al.	2007	PCR	VNTR	Locus26	Forward	TTGCCGAAATTTCTCTTTGG	Reverse	AGTCGGTCAGGGGTTGGT	193	-	-	-	-	-	-
Hilty et al.	2007	PCR	VNTR	Locus27	Forward	TGAGCCGATAGTGCAAAGTG	Reverse	TCGGTTTGGATGAATTGGTT	150	-	-	-	-	-	-
Hilty et al.	2007	PCR	VNTR	Locus28	Forward	TCTACCCCAACACCGAGAAC	Reverse	ATCCAAAATGGACACCGAAG	324	-	-	-	-	-	-
Hilty et al.	2007	PCR	VNTR	Locus29	Forward	TGATTCCCAAGACGAGAACC	Reverse	CCGTTCGTCGTCAAGTTGTA	231	-	-	-	-	-	-
Hilty et al.	2007	PCR	VNTR	Locus30	Forward	ACTTCACCAACGGCTTTCAC	Reverse	ACCAACTCCAAGGTCACCAG	211	-	-	-	-	-	-
Hilty et al.	2007	PCR	VNTR	Locus31	Forward	GTCAGGGCTTTGATCTCACC	Reverse	CGCTGCACGTCAAAACTAAG	310	-	-	-	-	-	-
Hilty et al.	2007	PCR	VNTR	Locus32	Forward	CCAGTTGCTGCAGAAGTTCA	Reverse	CGAAGTGAAAGGTCGTTTGG	344	-	-	-	-	-	-
Hilty et al.	2007	PCR	VNTR	Locus33	Forward	GTGTTCAGCAGGTTGGACTG	Reverse	TCTGATGACCCATGACCTGA	240	-	-	-	-	-	-
Hilty et al.	2007	PCR	VNTR	Locus34	Forward	TGCTGCTGGATTGTTTTCG	Reverse	CATGATGCCAAGCAGCAC	301	-	-	-	-	-	-

## Sheet: Genomes & Plasmids
Cluster	Author	Year	Species/Variants	Strain	Origin	Accession Number	Plasmide
MPM	Stinear et al.	2004	M. ulcerans	Agy99	Patient biopsy, Ghana	PRJNA16230	pMUM001
MPM	-	-	M. ulcerans	CSURQ0185	Human, Côte d'Ivoire	PRJEB34912	pMUM001
MPM	-	-	M. ulcerans	Harvey	Human, USA	PRJNA191796	pMUM001
MPM	-	-	M. ulcerans	SGL03	Human, DRC	PRJEB30333	pMUM001
MPM	Saad et al.	2019	M. ulcerans	P7741	Human, French Guiana	PRJEB30628	pMUM001
MPM	Saad et al.	2019	M. ulcerans	P7741	Human, French Guiana	PRJEB30628	pMUM001
MPM	Tobias et al.	2012	M. liflandii	128FXT	Xenopus tropicalis, University of California (Berkeley)	PRNJA128960	pMUM002
MPM	Hikima et al.	2016	M. pseudoshottsii	JCM15466 (L15)	Fish, USA	DDBJ #BCND01000001 #BCND01000247	-
MPM	-	-	M. shinshuense	ATCC 33728	Human, Japan	PRJDB5034	Plasmid pShTP
MPM	Das et al.	2018	M. marinum	DL240490	Fish, Israël	PRJNA414948	pMUM003
M. marinum	Das et al.	2018	M. marinum	1218R	Fish, USA	CP025779	pRAW
M. marinum	Weerdenburg et al.	2015	M. marinum	E11	Fish, Israël	PRJEB5070	-
M. marinum	Kurokawa et al.	2013	M. marinum	Europe	Fish, Europe	PRJNA174279	-
M. marinum	Kurokawa et al.	2013	M. marinum	MB2	Fish, Thaïland	PRJNA174278	-
M. marinum	Stinear et al.	2008	M. marinum	M	Human, University of California, San Francisco	PRJNA16725 (CP000854; CP000895)	Plasmid pMM23
M. gilvum	Kallimanis et al.	2011	M. gilvum	spyr1	Creosot soil, Greece	PRJNA28521	pMSPYR101;pMSPYR102
